# Supplementary material for: Hemin-Induced Transient Senescence via DNA Damage Response as Potential Neuroprotective Mechanism during Brain Hemorrhage
Source: Research Square preprint supplement (doi:10.21203/rs.3.rs-4686841/v1), 2024-07-26
Supplement: Supplementary file 1 [file babece9c1d9ad0b3b8648568.pdf]

## Supplementary Information

### **Hemin-Induced Transient Senescence Via DNA Damage Response: A Neuroprotective Mechanism Against Ferroptosis in Intracerebral Hemorrhage**

Vikas H. Maloji Rao<sup>1,2</sup>, Velmarini Vasquez<sup>1,2</sup>, Manohar Kodavati<sup>1,2</sup>, Joy Mitra<sup>1,2</sup>, Vincent Provasek<sup>1</sup>, Anh Voh<sup>3</sup>, Anton Liopo<sup>3</sup>, Paul J. Derry<sup>3</sup>, Andrei Mikheve<sup>2,4</sup>, Robert C. Rostomily<sup>2,4</sup>, Philip J. Horner<sup>2,4</sup>, James M. Tour<sup>5</sup>, Gavin W. Britz<sup>2,4</sup>, Thomas A. Kent<sup>3,6,7\*</sup>, Muralidhar Hegde<sup>1,2,4\*</sup>

<sup>1</sup>Division of DNA Repair Research within the <sup>2</sup>Center for Neuroregeneration, Department of Neurosurgery, Houston Methodist Research Institute, Houston, TX 77030, USA.

<sup>3</sup>Center for Genomics and Precision Medicine, Department of Translational Medical Sciences, Institute of Biosciences and Technology, College of Medicine, Texas A&M Health Science Center, Houston, TX 77030, USA.

<sup>4</sup>Department of Neuroscience, Weill Cornell Medical College, New York, NY 10065, USA.

<sup>5</sup>NanoCarbon Center and the Rice Institute for Advanced Materials, Department of Chemistry, Rice University, Houston, TX 77030, USA.

<sup>6</sup>Stanley Appel Department of Neurology and Department of Radiology, Houston Methodist Institute of Academic Medicine and Research Institute, Houston, TX 77030, USA.

<sup>7</sup>Department of Chemistry, Rice University, Houston, TX 77005, USA.

\*Corresponding authors: T.A.K. ([tkent@TAMU.edu](mailto:tkent@TAMU.edu)) and M.L.H. ([mlhegde@houstonmethodist.org](mailto:mlhegde@houstonmethodist.org))

**Supplementary Material** accompanying this paper includes one Table and six Figures.

# Supplementary Figure 1

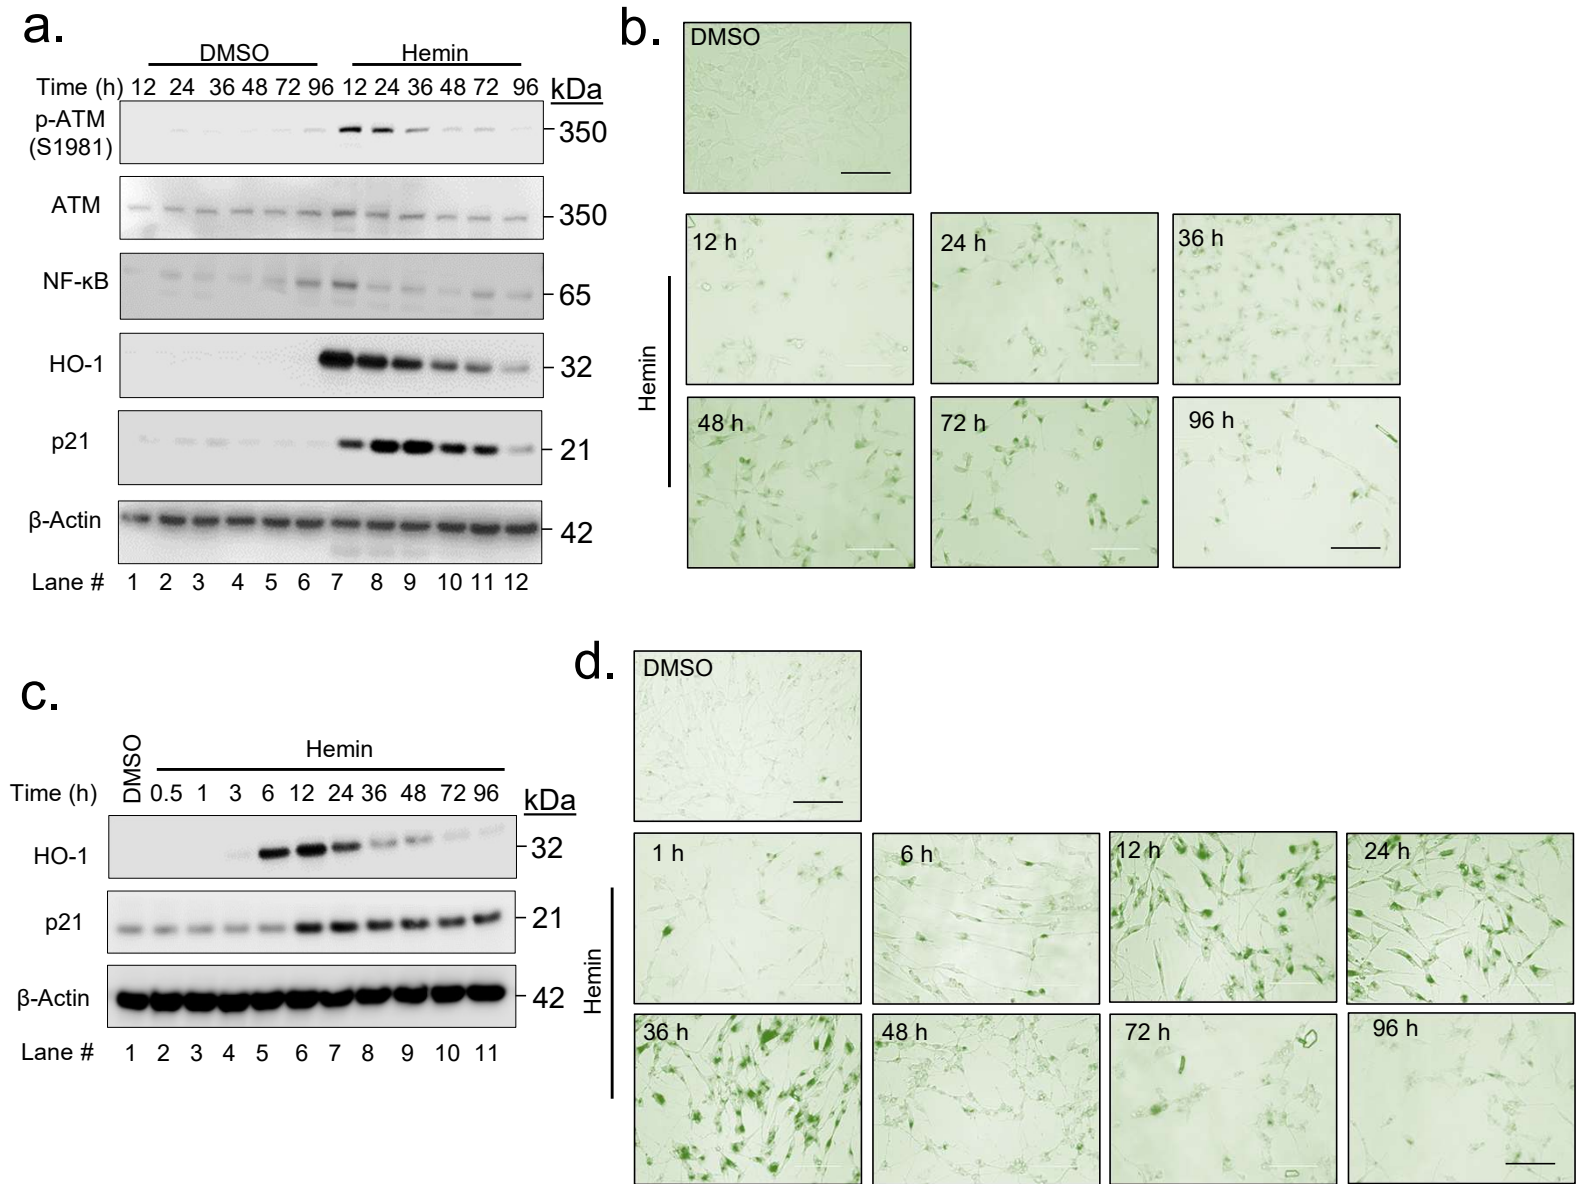

**Supplementary Fig. 1 (Related to Fig. 1): Hemin treatment leads to sequential induction of DDR, senescence, and HO-1 expression at extended time points.**

(a) SH-SY5Y cells were treated either with DMSO (lanes 1-6) or hemin (10  $\mu$ M) (lanes 7-12) and analyzed using western blot for p-ATM, NF- $\kappa$ B, HO-1, and p21 levels. (b) Representative images of cells stained with SA- $\beta$ -Gal after hemin treatment at indicated time points. (c) Western blot analysis of differentiated SH-SY5Y cells during a time-dependent kinetics study, treated with DMSO (lane 1) or hemin (lanes 2-9) to measure the levels of HO-1 and p21. (d) SA- $\beta$ -Gal staining of differentiated SH-SY5Y cells in a time-dependent kinetics study after hemin treatment. Scale bar = 20  $\mu$ m.

## Supplementary Figure 2

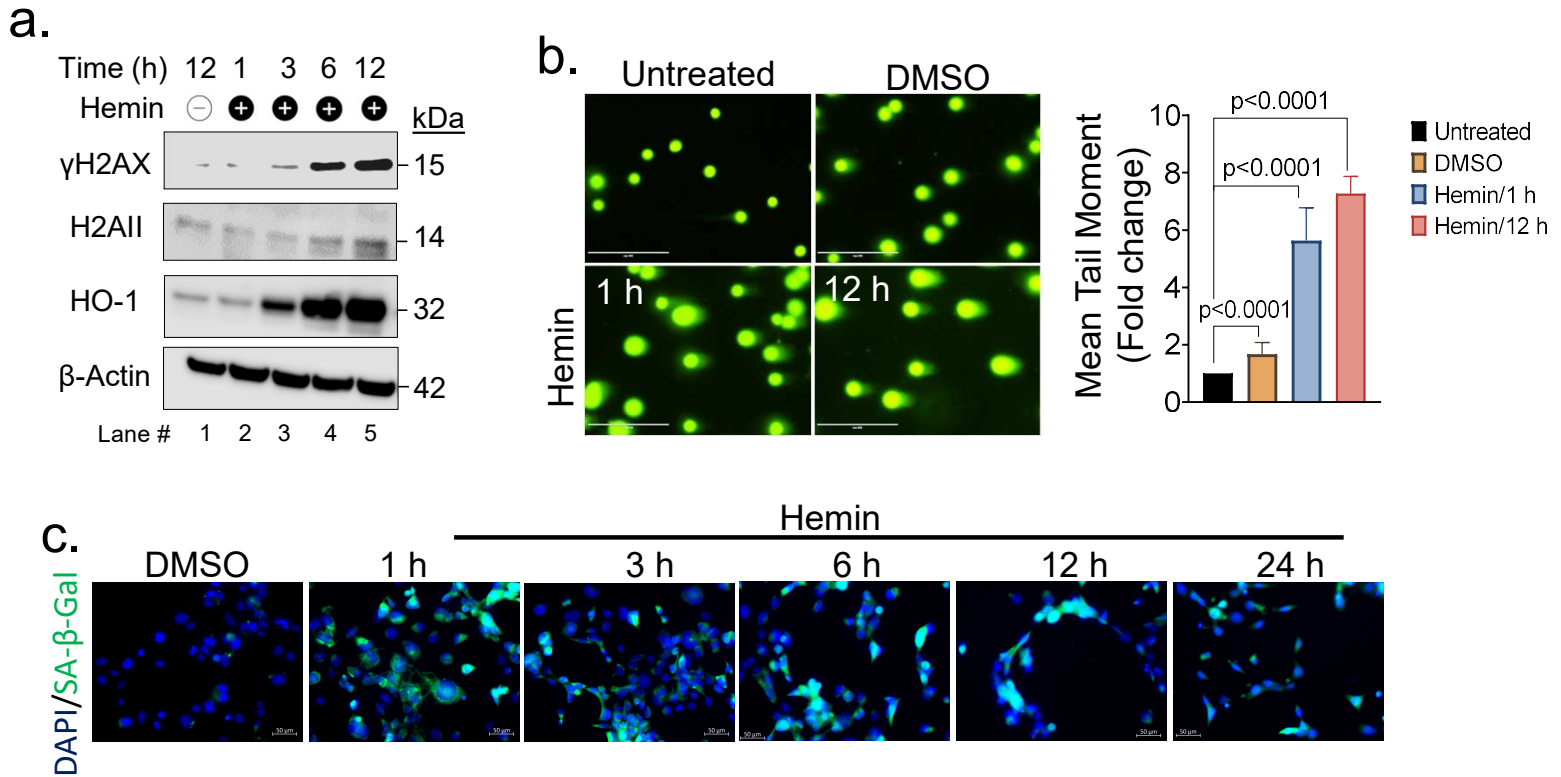

**Supplementary Fig. 2 (Related to Figs. 1 and 2): Hemin-mediated genomic damage, senescence, and HO-1 induction observed in human brain endothelial cells (HBEC-5i).**

(a) Western blot analysis of HBEC-5i cells during a time-dependent kinetics study, treated with hemin (10  $\mu$ M) (lanes 2-5) or DMSO (lane 1) to measure levels of  $\gamma$ H2AX and HO-1. (b) Neutral comet assay of HBEC-5i cells in a time-dependent kinetics study, treated with or without hemin; DMSO-treated cells were used as the control. DNA integrity is represented as mean comet tail moment fold change. (c) SA- $\beta$ -Gal staining of HBEC-5i cells in a time-dependent kinetics study, treated with hemin. Scale bar = 50 $\mu$ m. All statistical analyses were performed by two-sided student's t-test, p-values are indicated in the respective graph.

# Supplementary Figure 3

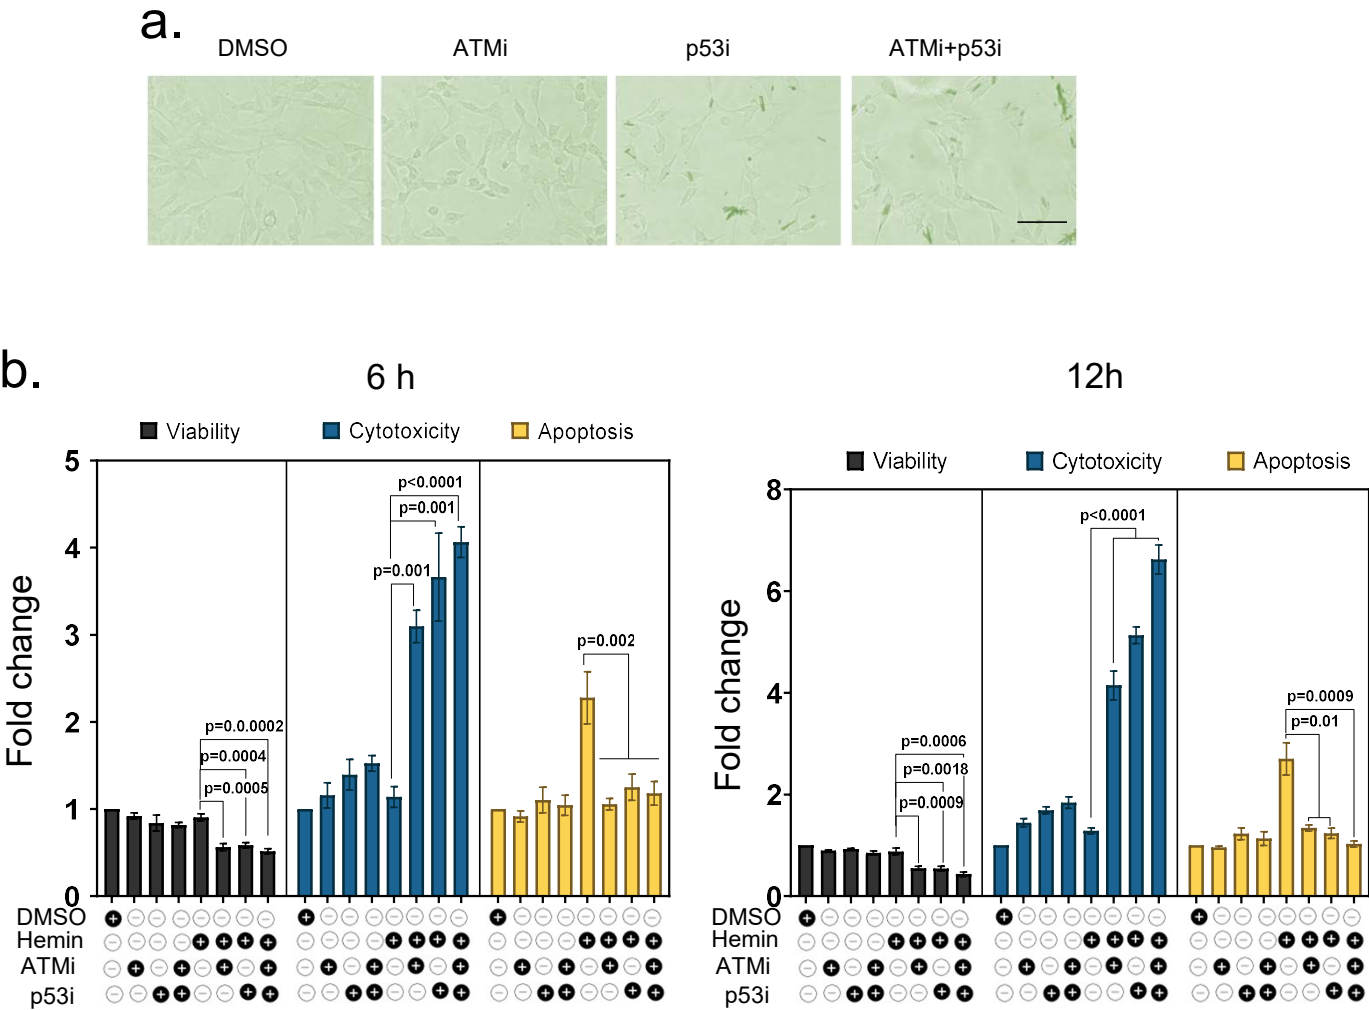

**Supplementary Fig. 3 (Related to Fig. 3): Inhibition of DDR using ATMi or p53i alleviates hemin-induced cell toxicity and death.**

(a) SA-β-Gal staining of SH-SY5Y cells after treatment with pharmacological inhibitors of ATM (KU-55933) and p53 (Pifithrin-α). Scale bar = 20 μm. (b) Viability, cytotoxicity, and apoptosis (caspase-3/7 activity) analysis in cells treated with hemin ± pharmacological inhibitors of ATM and p53 for 6 h and 12 h, DMSO treatment is used as a control. All statistical analyses were performed by two-sided student's t-test, p-values are indicated in the respective graph.

## Supplementary Figure 4

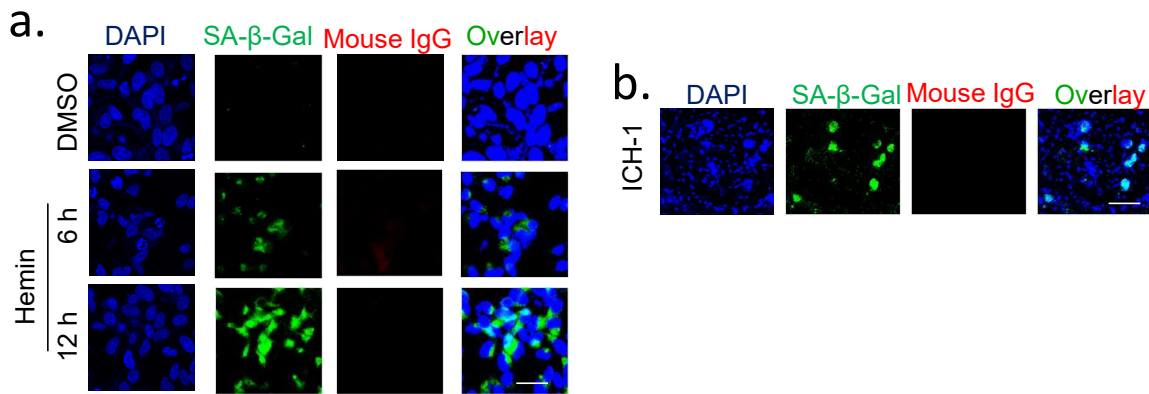

**Supplementary Fig. 4 (Related to Figs. 5 and 6): Validation of antibody specificity.**

(a) IF co-staining was performed using SA- $\beta$ -Gal and mouse IgG instead of primary antibody against HO-1 followed by anti-mouse-Alexa Fluor 647 at a 1/1,000 dilution. Nuclear DNA was stained with DAPI in SH-SY5Y cells that were exposed with or without hemin for 6 h and 12 h. Scale bar = 20  $\mu$ m. (b) In a similar control experiment using ICH patient tissue, IF co-staining was performed using SA- $\beta$ -Gal and mouse IgG instead of HO-1 primary antibody, counterstained with DAPI. Scale bar = 20  $\mu$ m.



# Supplementary Figure 5

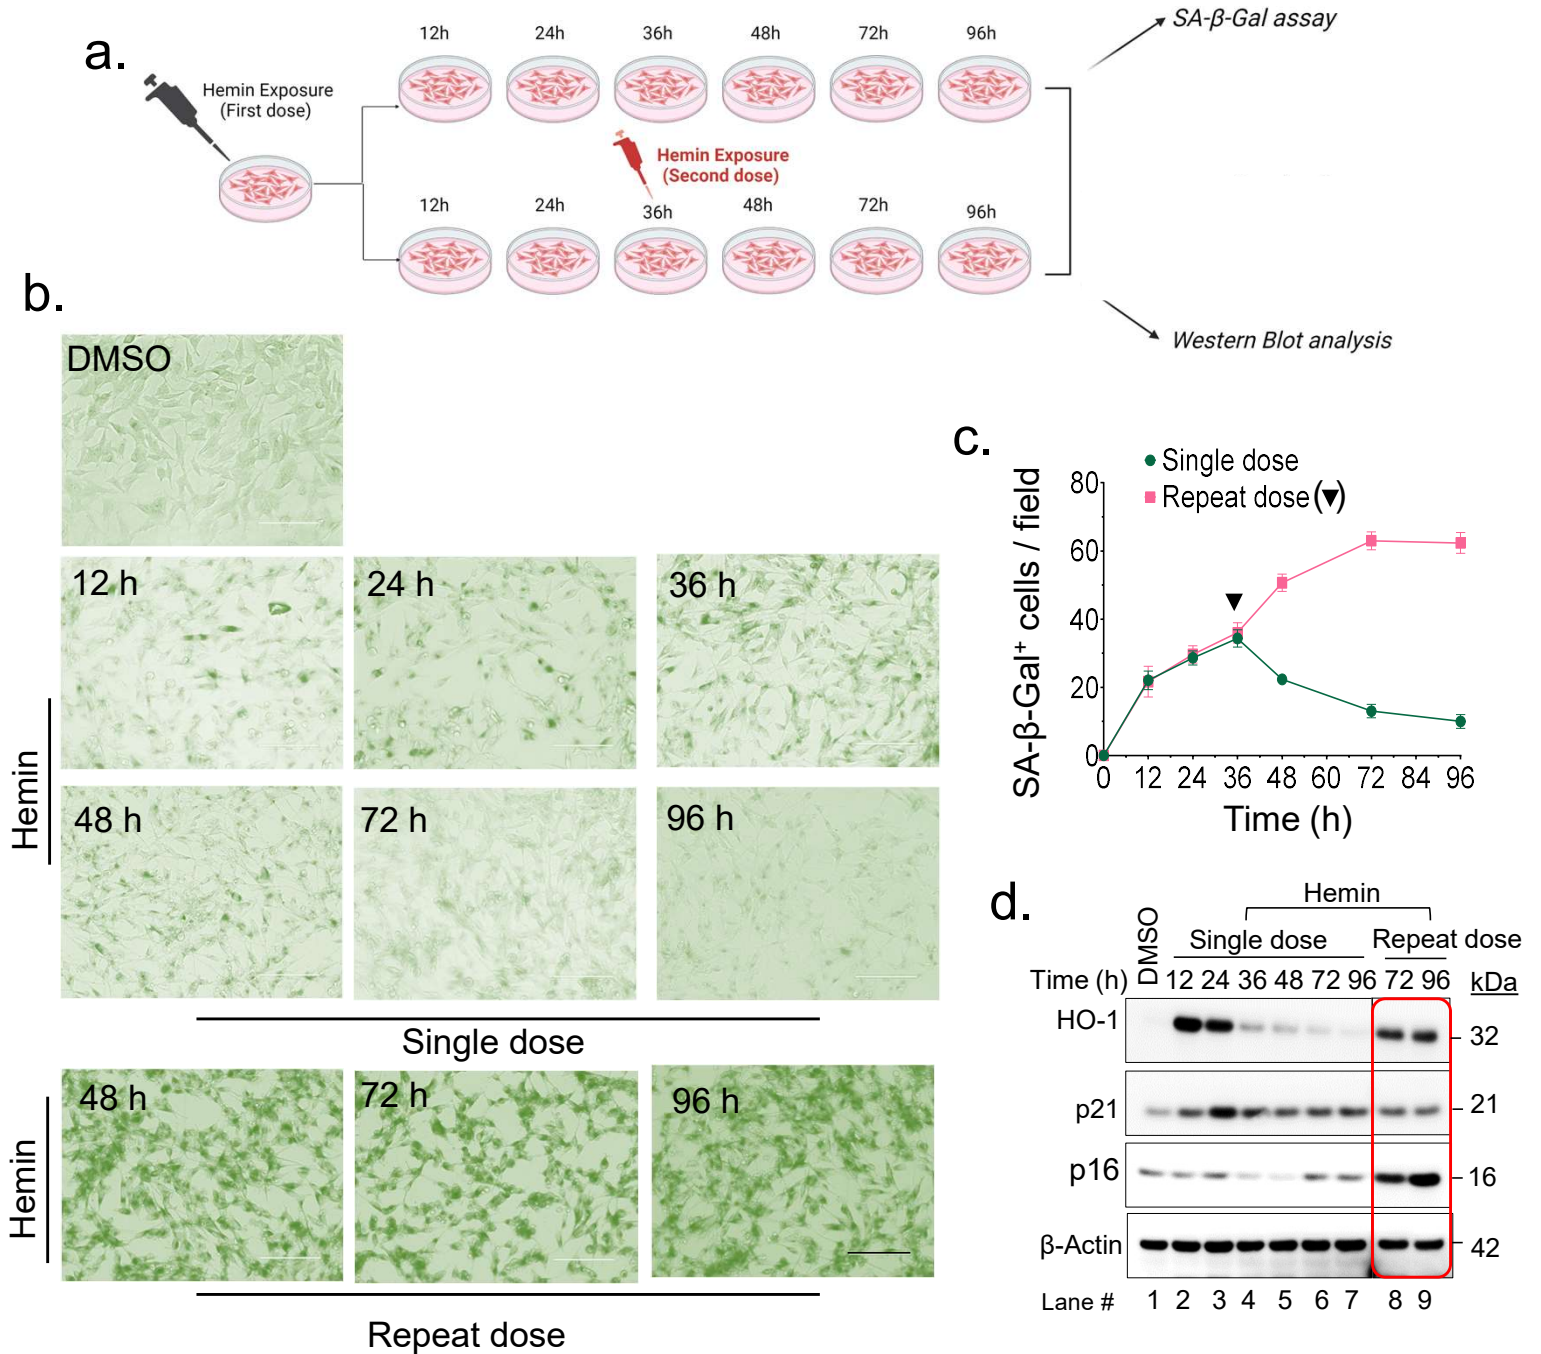

**Supplementary Fig. 5 (Related to Fig. 8):** (a) A schematic diagram illustrating the treatment plan of SH-SY5Y cells with hemin, followed by subsequent experiments. (b) SA-β-Gal staining of SH-SY5Y cells treated with or without hemin (10 μM) at the indicated time points. (c) Quantitation of the SA-β-Gal positive cells per field, arrow indicating the second dose hemin treatment time point. Scale bar = 20 μm. (d) Western blot analysis was performed to evaluate the expression of HO-1, p21, and p16 proteins at indicated time points after hemin treatment. The data was derived from three independent experiments.

# Supplementary Figure 5

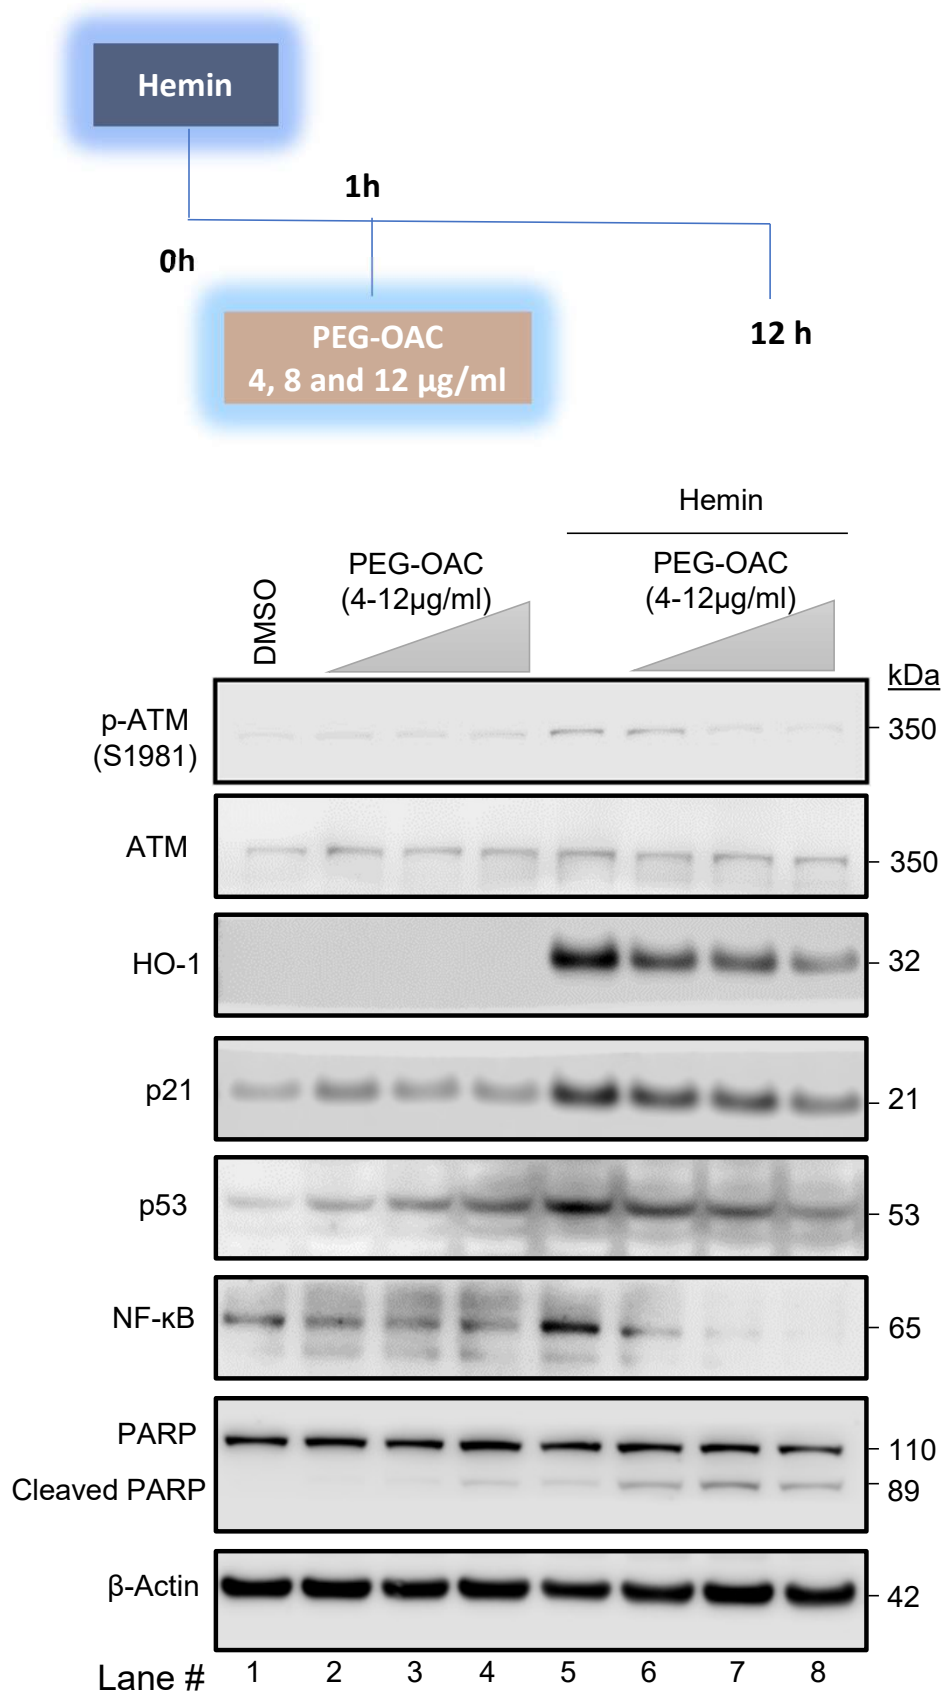

**Supplementary Fig. 6: (Related to Fig. 9). PEG-OAC prevents DNA damage and senescence in a dose-dependent manner.** Western blot analysis was conducted with or without PEG-OAC and DEF-OAC-PEG to examine the expression of p-ATM (S1981), HO-1, p21, p53, NF-κB (p65), and cleaved PARP proteins 12h after hemin treatment.

# Supplementary Figure 6

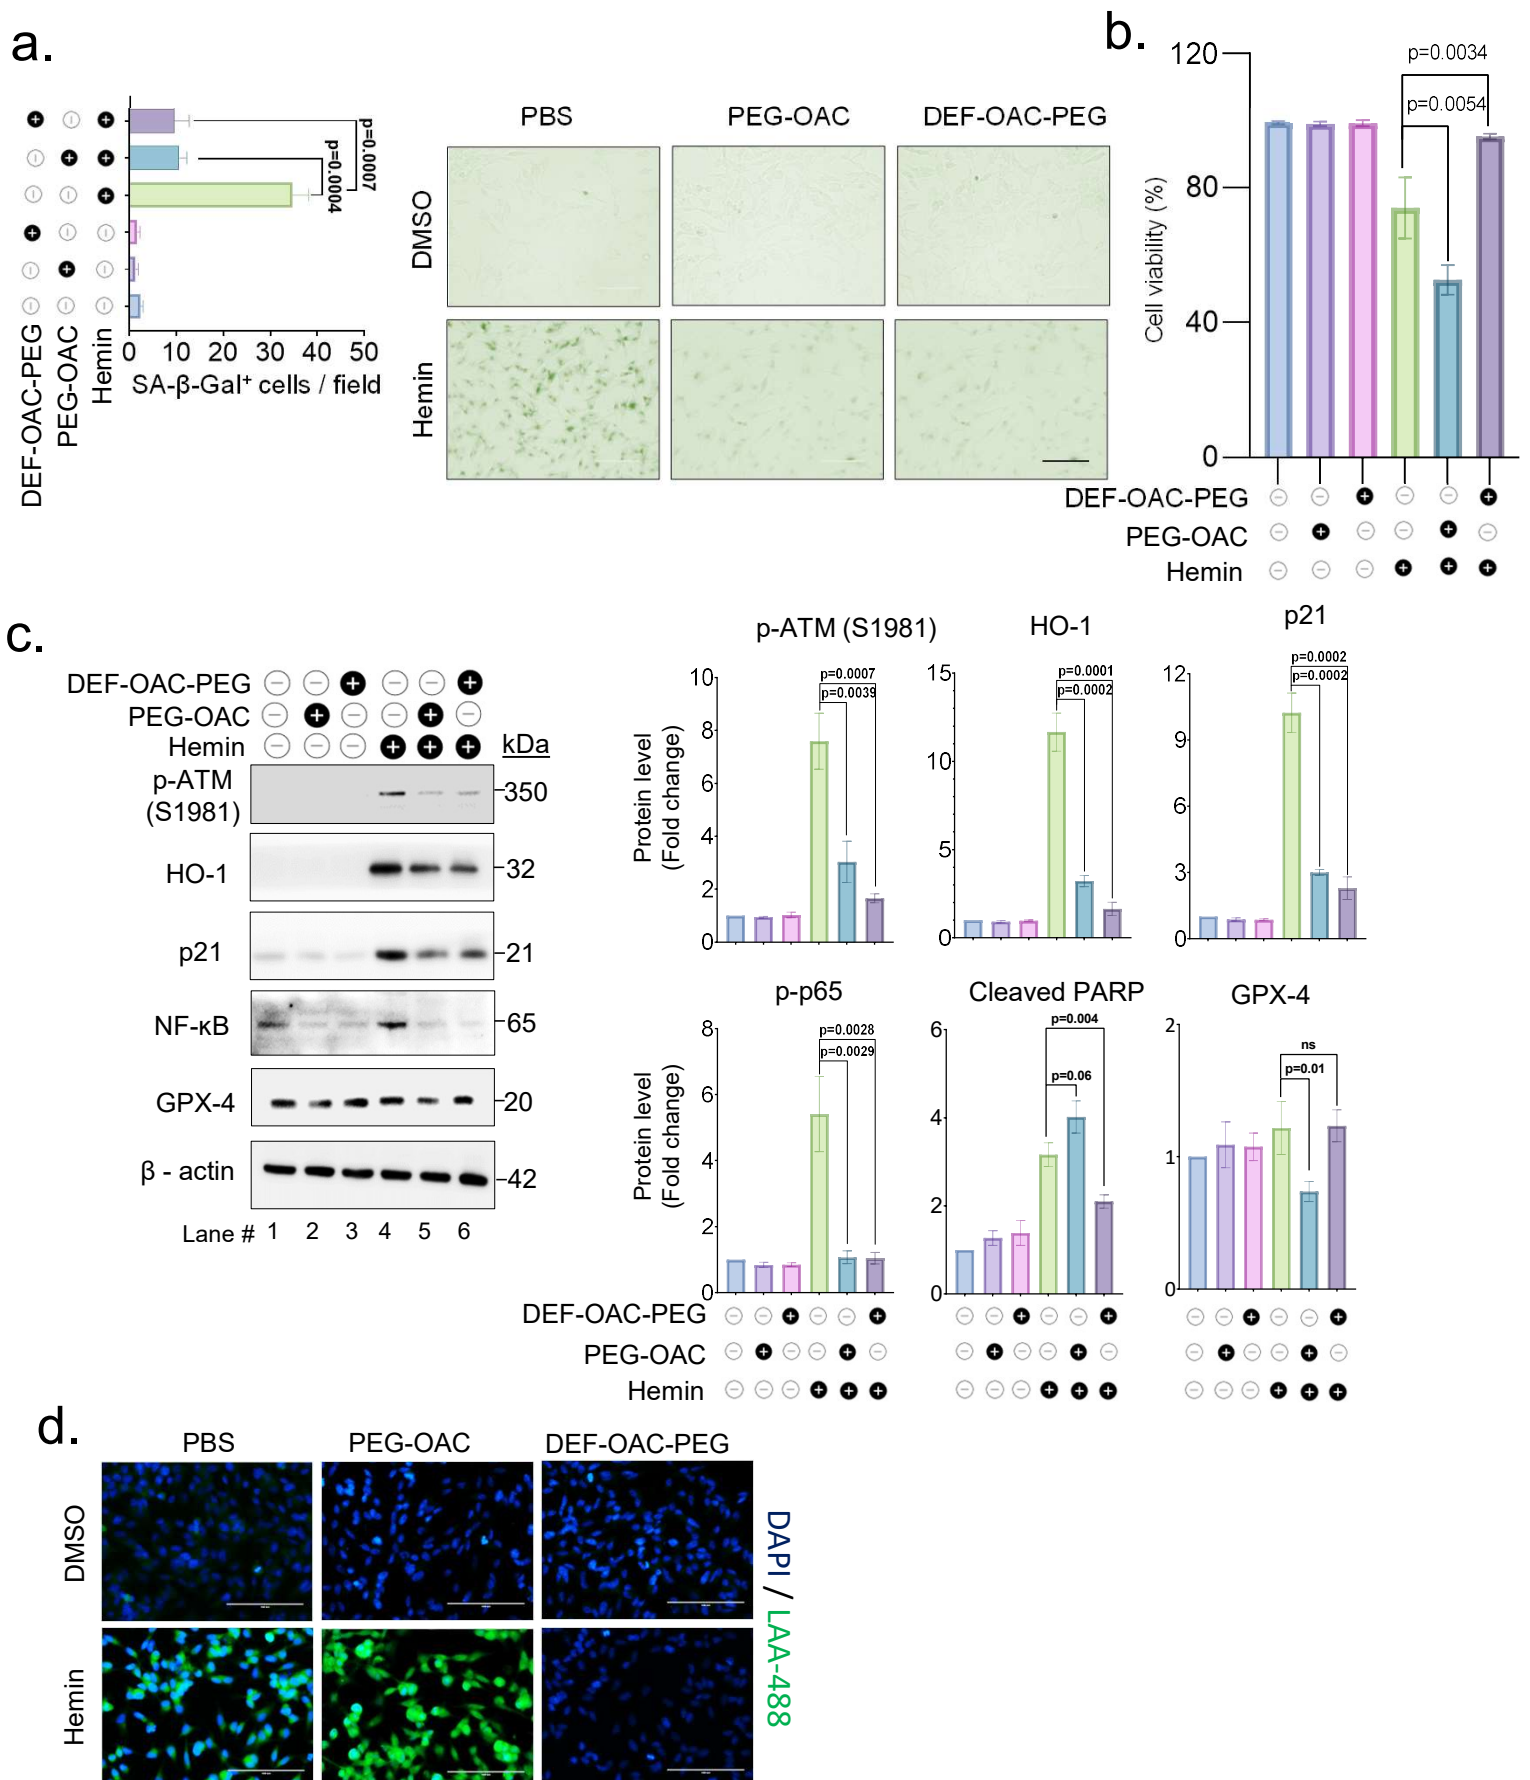



**Supplementary Fig.7 (Related to Fig. 9):**

SH-SY5Y cells were exposed to PEG-OACC and DEF-OAC-PEG nanoparticles 1 h after hemin (10  $\mu$ M) treatment. (a) Percentage of SA- $\beta$ -Gal positive cells in experimental groups, along with representative images of SA- $\beta$ -Gal staining in differentiated NPSCs cells treated with or without hemin and nanoparticles (PEG-OAC and DEF-OAC-PEG) for 24 h. Scale bar = 20  $\mu$ m. (b) Viability assay of SH-SY5Y cells treated with hemin and nanoparticles (PEG-OAC and DEF-OAC-PEG) for 24 h. (c) Western blot analysis to assess the expression of p-ATM (S1981), HO-1, p21, NF- $\kappa$ B (p65), cleaved PARP, and GPX-4 proteins at indicated time points, the data presented is derived from three independent experiments. (d) Representative image of Lipid peroxidation assay using Click-iT™ Lipid Peroxidation Imaging Kit after 24 h treatment with hemin and nanoparticles (PEG-OAC and DEF-OAC-PEG) Scale bar = 20  $\mu$ m. All statistical analyses were performed by two-sided student's t-test, p-values are indicated in the respective graph.

| <b>Sample ID</b> | <b>Age (years)</b> | <b>Sex</b> | <b>Clinic Diagnosis</b>                                                  | <b>Time from ICH to sample collection (Days)</b> | <b>Type of Surgery</b>                                                                                                             |
|------------------|--------------------|------------|--------------------------------------------------------------------------|--------------------------------------------------|------------------------------------------------------------------------------------------------------------------------------------|
| Control 1        | 57                 | Female     | Unknown                                                                  | NA                                               | non-neurological postmortem tissue.                                                                                                |
| Control 2        | 43                 | Female     | Unknown                                                                  | NA                                               | non-neurological postmortem tissue.                                                                                                |
| Control 3        | 63                 | Male       | Encephalopathy, broncho-pneumonia and pleuritis, acute renal dysfunction | NA                                               | non-neurological postmortem tissue.                                                                                                |
| ICH 1            | 70                 | Male       | Intraparenchymal hematoma                                                | ~1                                               | Left frontal occipital craniotomy and resection of intraventricular hemorrhage with neuronavigation                                |
| ICH 2            | 30                 | Female     | Residual vascular malformation with hemorrhage                           | ~22                                              | Left frontal craniotomy and microsurgical resection of cavernous vascular malformation with intraoperative MRI and neuronavigation |
| ICH 3            | 64                 | Male       | Intracerebral hemorrhage with acute hypoxic/ ischemic injury             | ~3                                               | Right-sided craniotomy and microscopic resection of ICH with neuronavigation                                                       |

**Supplementary Table 1:** Demographics and clinical diagnosis of ICH patients and non-neurological control brain tissues from the Binghamton Biospecimen Archive.
